# Supplementary material for: Identification of ABF/AREB gene family in tomato (Solanum lycopersicum L.) and functional analysis of ABF/AREB in response to ABA and abiotic stresses
Source: PeerJ. 2023 May 4;11:e15310. doi: 10.7717/peerj.15310 (PMC10164373; doi:10.7717/peerj.15310)
Supplement: Supplemental Information 2 [file peerj-11-15310-s002.xlsx]

## Sheet: Sheet1
		supplementary file . qRT-PCR data.
				repetion1	reprtion2	reprtion3	Actin1	Actin2	Action3
		SlABF1	0hCK	24.86	25.05	24.74	18.55	17.54	17.34
			12hCK	24.99	24.64	24.75	16.59	17.12	17.79
			24hCK	24.21	24.39	24.06	16.53	17.57	18.25
			0hABA	24.86	25.05	24.74	18.55	17.54	17.34
			12hABA	25.38	25.37	25.19	20.79	21.56	21.47
			24hABA	26.02	25.77	25.65	20.12	20.68	20.39
			0hNaCl	24.86	25.05	24.74	18.55	17.54	17.34
			12hNaCl	25.19	24.73	25.98	19.82	19.29	19.82
			24hNaCl	25.45	25.72	26.03	19.28	18.98	19.47
			0hUv	24.86	25.05	24.74	18.55	17.54	17.34
			12hUv	26.41	26.12	25.74	21.64	21.8	21.79
			24hUv	28.17	28.25	28.35	23.08	23.59	23.18
			0hCold	24.86	25.05	24.74	18.55	17.54	17.34
			12hCold	25.18	25.02	25.17	18.89	18.91	19.19
			24hCold	25.44	25.09	25.21	19.48	19.4	19.15
			0hFLD	24.86	25.05	24.74	18.55	17.54	17.34
			12hFLD	25.77	25.81	25.76	20.19	20.09	19.83
			24hFLD	24.9	24.96	24.93	19.19	19.01	19.35
			0hPEG	24.86	25.05	24.74	18.55	17.54	17.34
			12hPEG	24.23	24.15	24.22	17.83	18.19	18.05
			24hPEG	25.3	25.36	25.4	21	21.28	21.82
		SlABF2	0hCK	22.95	22.96	22.84	18.55	17.54	17.34
			12hCK	22.06	22.32	22.59	16.59	17.12	17.79
			24hCK	20.84	22.2	22.61	16.53	17.57	18.25
			0hABA	18.89	19.18	19.59	18.55	17.54	17.34
			12hABA	23.33	23.88	24.01	20.79	21.56	21.47
			24hABA	22.95	23.27	22.97	20.12	20.68	20.39
			0hNaCl	22.95	22.96	22.84	18.55	17.54	17.34
			12hNaCl	22.82	22.59	22.3	19.82	19.29	19.82
			24hNaCl	22.46	22.14	22.15	19.28	18.98	19.47
			0hUv	22.95	22.96	22.84	18.55	17.54	17.34
			12hUv	25.76	25.52	25.72	21.64	21.8	21.79
			24hUv	27.29	27.17	27.29	23.08	23.59	23.18
			0hCold	22.95	22.96	22.84	18.55	17.54	17.34
			12hCold	25.36	24.96	25.41	18.89	18.91	19.19
			24hCold	24.15	23.66	24.09	19.48	19.4	19.15
			0hFLD	22.95	22.96	22.84	18.55	17.54	17.34
			12hFLD	22.73	22.72	22.77	20.19	20.09	19.83
			24hFLD	22.17	22.26	22.22	19.19	19.01	19.35
			0hPEG	22.95	22.96	22.84	18.55	17.54	17.34
			12hPEG	20.72	21.13	21	17.83	18.19	18.05
			24hPEG	23.36	23.41	24.1	21	21.28	21.82
		SlABF3	0hCK	36.41	36.84	37.28	18.55	17.54	17.34
			12hCK	38.12	-	36.06	16.59	17.12	17.79
			24hCK	33.35	33.5	34.69	16.53	17.57	18.25
			0hABA	36.41	36.84	37.28	18.55	17.54	17.34
			12hABA	34.98	38.04	35.82	20.79	21.56	21.47
			24hABA	35.35	37.63	37.65	20.12	20.68	20.39
			0hNaCl	36.41	36.84	37.28	18.55	17.54	17.34
			12hNaCl	33.84	35.22	35.13	19.82	19.29	19.82
			24hNaCl	36.47	35.84	36.42	19.28	18.98	19.47
			0hUv	36.41	36.84	37.28	18.55	17.54	17.34
			12hUv	38.14	36.94	37.5	21.64	21.8	21.79
			24hUv	36.58	34.48	33.14	23.08	23.59	23.18
			0hCold	36.41	36.84	37.28	18.55	17.54	17.34
			12hCold	30.89	31.61	31.13	18.89	18.91	19.19
			24hCold	32.48	32.2	32.11	19.48	19.4	19.15
			0hFLD	36.41	36.84	37.28	18.55	17.54	17.34
			12hFLD	35.48	37.57	37.98	20.19	20.09	19.83
			24hFLD	36.09	35.96	34.4	19.19	19.01	19.35
			0hPEG	36.41	36.84	37.28	18.55	17.54	17.34
			12hPEG	34.59	34.12	32.28	17.83	18.19	18.05
			24hPEG	31.3	32.88	34.78	21	21.28	21.82
		SlABF4	0hCK	26.56	26.26	26.29	18.55	17.54	17.34
			12hCK	24.93	24.94	24.95	16.59	17.12	17.79
			24hCK	25.36	24.59	25.14	16.53	17.57	18.25
			0hABA	26.56	26.26	26.29	18.55	17.54	17.34
			12hABA	27.94	28.27	27.93	20.79	21.56	21.47
			24hABA	26.32	26.89	26.23	20.12	20.68	20.39
			0hNaCl	26.56	26.26	26.29	18.55	17.54	17.34
			12hNaCl	27.47	28.16	27.21	19.82	19.29	19.82
			24hNaCl	28.26	28.3	28.28	19.28	18.98	19.47
			0hUv	26.56	26.26	26.29	18.55	17.54	17.34
			12hUv	28.65	28.8	28.66	21.64	21.8	21.79
			24hUv	30.33	29.92	29.62	23.08	23.59	23.18
			0hCold	26.56	26.26	26.29	18.55	17.54	17.34
			12hCold	26.08	26.06	26.02	18.89	18.91	19.19
			24hCold	26.07	26.09	26.04	19.48	19.4	19.15
			0hFLD	26.56	26.26	26.29	18.55	17.54	17.34
			12hFLD	26.57	25.56	26.04	20.19	20.09	19.83
			24hFLD	25.77	25.71	25.69	19.19	19.01	19.35
			0hPEG	26.56	26.26	26.29	18.55	17.54	17.34
			12hPEG	26.91	27.39	27.61	17.83	18.19	18.05
			24hPEG	27.26	25.68	28.79	21	21.28	21.82
		SlABF5	0hCK	23.44	23.38	23.52	18.55	17.54	17.34
			12hCK	22.1	21.97	22.12	16.59	17.12	17.79
			24hCK	21.74	22.19	22.48	16.53	17.57	18.25
			0hABA	23.44	23.38	23.52	18.55	17.54	17.34
			12hABA	23.67	23.7	23.97	20.79	21.56	21.47
			24hABA	23.6	23.69	23.55	20.12	20.68	20.39
			0hNaCl	23.44	23.38	23.52	18.55	17.54	17.34
			12hNaCl	22.63	22.42	22.89	19.82	19.29	19.82
			24hNaCl	22.25	22.05	21.97	19.28	18.98	19.47
			0hUv	23.44	23.38	23.52	18.55	17.54	17.34
			12hUv	26.48	26.58	26.54	21.64	21.8	21.79
			24hUv	26.25	26.64	26.26	23.08	23.59	23.18
			0hCold	23.44	23.38	23.52	18.55	17.54	17.34
			12hCold	21.64	21.53	21.48	18.89	18.91	19.19
			24hCold	21.55	21.65	21.56	19.48	19.4	19.15
			0hFLD	23.44	23.38	23.52	18.55	17.54	17.34
			12hFLD	24.22	24.1	25.83	20.19	20.09	19.83
			24hFLD	22.72	22.41	22.38	19.19	19.01	19.35
			0hPEG	23.44	23.38	23.52	18.55	17.54	17.34
			12hPEG	21.43	21.16	21.21	17.83	18.19	18.05
			24hPEG	20.46	24.74	23.14	21	21.28	21.82
		SlABF6	0hCK	23.9	24.23	24.27	18.55	17.54	17.34
			12hCK	25.28	25.74	25.82	16.59	17.12	17.79
			24hCK	25.01	25.04	25.06	16.53	17.57	18.25
			0hABA	23.9	24.23	24.27	18.55	17.54	17.34
			12hABA	27.64	27.11	28.46	20.79	21.56	21.47
			24hABA	25.73	25.88	25.62	20.12	20.68	20.39
			0hNaCl	23.9	24.23	24.27	18.55	17.54	17.34
			12hNaCl	29.16	30.01	29.52	19.82	19.29	19.82
			24hNaCl	29.33	29.58	29.04	19.28	18.98	19.47
			0hUv	23.9	24.23	24.27	18.55	17.54	17.34
			12hUv	36.7	34.45	35.06	21.64	21.8	21.79
			24hUv	34.4	34.3	35.27	23.08	23.59	23.18
			0hCold	23.9	24.23	24.27	18.55	17.54	17.34
			12hCold	29.84	30.04	29.91	18.89	18.91	19.19
			24hCold	30.1	30.07	29.81	19.48	19.4	19.15
			0hFLD	23.9	24.23	24.27	18.55	17.54	17.34
			12hFLD	26.94	26.71	26.82	20.19	20.09	19.83
			24hFLD	25.96	25.51	25.68	19.19	19.01	19.35
			0hPEG	23.9	24.23	24.27	18.55	17.54	17.34
			12hPEG	24.81	23.83	24.18	17.83	18.19	18.05
			24hPEG	22.97	27.05	27.04	21	21.28	21.82
		SlABF7	0hCK	27.71	28.13	28.35	18.55	17.54	17.34
			12hCK	27.91	28.37	28.11	16.59	17.12	17.79
			24hCK	28.27	28.5	28.16	16.53	17.57	18.25
			0hABA	27.71	28.13	28.35	18.55	17.54	17.34
			12hABA	29.49	29.5	30.15	20.79	21.56	21.47
			24hABA	29.1	29	29.9	20.12	20.68	20.39
			0hNaCl	27.71	28.13	28.35	18.55	17.54	17.34
			12hNaCl	29.81	30.17	29.65	19.82	19.29	19.82
			24hNaCl	31.03	31.54	31.95	19.28	18.98	19.47
			0hUv	27.71	28.13	28.35	18.55	17.54	17.34
			12hUv	35.06	35.43	35.36	21.64	21.8	21.79
			24hUv	33.73	33.19	32.41	23.08	23.59	23.18
			0hCold	27.71	28.13	28.35	18.55	17.54	17.34
			12hCold	28.76	28.74	28.83	18.89	18.91	19.19
			24hCold	29.79	30.14	29.78	19.48	19.4	19.15
			0hFLD	27.71	28.13	28.35	18.55	17.54	17.34
			12hFLD	29.86	29.47	29.94	20.19	20.09	19.83
			24hFLD	29.79	29.8	29.72	19.19	19.01	19.35
			0hPEG	27.71	28.13	28.35	18.55	17.54	17.34
			12hPEG	29.86	28.12	26.37	17.83	18.19	18.05
			24hPEG	26.74	29.92	30.82	21	21.28	21.82
		SlABF8	0hCK	26.06	26.25	26.28	18.55	17.54	17.34
			12hCK	26.55	26.15	25.65	16.59	17.12	17.79
			24hCK	25.1	25.03	25.15	16.53	17.57	18.25
			0hABA	26.06	26.25	26.28	18.55	17.54	17.34
			12hABA	26.75	26.87	26.86	20.79	21.56	21.47
			24hABA	26.75	26.53	26.74	20.12	20.68	20.39
			0hNaCl	26.06	26.25	26.28	18.55	17.54	17.34
			12hNaCl	28.11	28.12	28.09	19.82	19.29	19.82
			24hNaCl	26.42	26.62	26.75	19.28	18.98	19.47
			0hUv	26.06	26.25	26.28	18.55	17.54	17.34
			12hUv	28.49	28.06	29.43	21.64	21.8	21.79
			24hUv	29.63	30.31	30.27	23.08	23.59	23.18
			0hCold	26.06	26.25	26.28	18.55	17.54	17.34
			12hCold	25.38	25.35	25.39	18.89	18.91	19.19
			24hCold	26.09	26.08	26.62	19.48	19.4	19.15
			0hFLD	26.06	26.25	26.28	18.55	17.54	17.34
			12hFLD	25.89	25.58	26.1	20.19	20.09	19.83
			24hFLD	24.98	26.07	24.85	19.19	19.01	19.35
			0hPEG	26.06	26.25	26.28	18.55	17.54	17.34
			12hPEG	24.58	24.83	24.92	17.83	18.19	18.05
			24hPEG	27.09	27.57	27.7	21	21.28	21.82
		SlABF9	0hCK	24.01	24.28	24.37	18.55	17.54	17.34
			12hCK	24.34	24.45	24.54	16.59	17.12	17.79
			24hCK	23.73	23.91	23.88	16.53	17.57	18.25
			0hABA	24.01	24.28	24.37	18.55	17.54	17.34
			12hABA	25.73	25.86	25.8	20.79	21.56	21.47
			24hABA	25.56	25.47	25.62	20.12	20.68	20.39
			0hNaCl	24.01	24.28	24.37	18.55	17.54	17.34
			12hNaCl	32.11	31.91	33.63	19.82	19.29	19.82
			24hNaCl	32.64	33.24	32.6	19.28	18.98	19.47
			0hUv	24.01	24.28	24.37	18.55	17.54	17.34
			12hUv	36.07	35.74	35.7	21.64	21.8	21.79
			24hUv	34.33	36.45	34.41	23.08	23.59	23.18
			0hCold	24.01	24.28	24.37	18.55	17.54	17.34
			12hCold	31.31	33.69	31.98	18.89	18.91	19.19
			24hCold	31.82	31.33	31.22	19.48	19.4	19.15
			0hFLD	24.01	24.28	24.37	18.55	17.54	17.34
			12hFLD	24.87	24.76	24.78	20.19	20.09	19.83
			24hFLD	24.45	24.46	24.49	19.19	19.01	19.35
			0hPEG	24.01	24.28	24.37	18.55	17.54	17.34
			12hPEG	23.56	23.97	24.6	17.83	18.19	18.05
			24hPEG	25.88	25.89	26.17	21	21.28	21.82
		SlABF10	0hCK	22.89	22.8	23.19	18.55	17.54	17.34
			12hCK	22.73	22.66	22.64	16.59	17.12	17.79
			24hCK	22.22	22.31	22.26	16.53	17.57	18.25
			0hABA	22.89	22.8	23.19	18.55	17.54	17.34
			12hABA	23.4	23.47	23.22	20.79	21.56	21.47
			24hABA	22.69	23.57	23.12	20.12	20.68	20.39
			0hNaCl	22.89	22.8	23.19	18.55	17.54	17.34
			12hNaCl	22.92	23.2	23.09	19.82	19.29	19.82
			24hNaCl	22.3	22.32	22.42	19.28	18.98	19.47
			0hUv	22.89	22.8	23.19	18.55	17.54	17.34
			12hUv	25.08	24.47	24.47	21.64	21.8	21.79
			24hUv	26.62	26.83	26.94	23.08	23.59	23.18
			0hCold	22.89	22.8	23.19	18.55	17.54	17.34
			12hCold	22.37	22.08	22.01	18.89	18.91	19.19
			24hCold	22.58	22.54	22.53	19.48	19.4	19.15
			0hFLD	22.89	22.8	23.19	18.55	17.54	17.34
			12hFLD	22.68	22.25	22.18	20.19	20.09	19.83
			24hFLD	22.01	22.22	21.93	19.19	19.01	19.35
			0hPEG	22.89	22.8	23.19	18.55	17.54	17.34
			12hPEG	20.64	20.78	21.06	17.83	18.19	18.05
			24hPEG	23.83	23.93	24	21	21.28	21.82
