# Supplementary material for: Identification of ABF/AREB gene family in tomato (Solanum lycopersicum L.) and functional analysis of ABF/AREB in response to ABA and abiotic stresses
Source: PeerJ. 2023 May 4;11:e15310. doi: 10.7717/peerj.15310 (PMC10164373; doi:10.7717/peerj.15310)
Supplement: Supplemental Information 3 [file peerj-11-15310-s003.xlsx]

## Sheet: Sheet1
	supplementary file .The Ka/Ks values of ABF/AREB genes in tomato
	Seq_1	Seq_2	Ka	Ks	Ka/Ks
	SlABF7	SlABF9	0.626954	2.12694	0.294768
	SlABF7	SlABF10	0.247582	0.727687	0.247582
	SlABF8	SlABF9	0.161814	0.605519	0.267233
