# Supplementary material for: Identification of ABF/AREB gene family in tomato (Solanum lycopersicum L.) and functional analysis of ABF/AREB in response to ABA and abiotic stresses
Source: PeerJ. 2023 May 4;11:e15310. doi: 10.7717/peerj.15310 (PMC10164373; doi:10.7717/peerj.15310)
Supplement: Supplemental Information 6 [file peerj-11-15310-s006.xlsx]

## Sheet: Sheet1
	Supplementary file : Cis-acting elements of SlABFs in promoter region.
	Element	Description	Gene
			SlABF1	SlABF2	SlABF3	SlABF4	SlABF5	SlABF6	SlABF7	SlABF8	SlABF9	SlABF10
	3-AF1 binding site	light responsive element		1		1
	A-box	cis-acting regulatory element	1
	ABRE	cis-acting element involved in the abscisic acid responsiveness	1	2	1	3	1	1			2	7
	ACE	cis-acting element involved in light responsiveness		1		1		1				1
	AE-box	part of a module for light response			1		1			2		1
	ARE	cis-acting regulatory element essential for the anaerobic induction	4		1		2	2		3	1	2
	AT1-motif	part of a light responsive module		1				1
	ATCT-motif	part of a conserved DNA module involved in light responsiveness									1	1
	AT-rich element	binding site of AT-rich DNA binding protein (ATBP-1)		1				2
	AT-rich sequence	element for maximal elicitor-mediated activation (2copies)									1
	AuxRR-core	cis-acting regulatory element involved in auxin responsiveness				1		1
	Box 4	part of a conserved DNA module involved in light responsiveness	1	2	1	6	1	5	1	7	4	4
	CAAT-box	common cis-acting element in promoter and enhancer regions	13	10	16	17	25	11	11	12	15	17
	CAT-box	cis-acting regulatory element related to meristem expression	1		1		1
	CCAAT-box	MYBHv1 binding site			1
	CGTCA-motif	cis-acting regulatory element involved in the MeJA-responsiveness		1	2			1	2		1
	chs-CMA2a	part of a light responsive element								1	1
	circadian	cis-acting regulatory element involved in circadian control		1	1			1				2
	GA-motif	part of a light responsive element		1						1
	Gap-box	part of a light responsive element					1
	GARE-motif	gibberellin-responsive element	3			1				1	1
	GATA-motif	part of a light responsive element	1		1			1		1		2
	G-Box	cis-acting regulatory element involved in light responsiveness	1	1	2	3	1	1			2	6
	GC-motif	enhancer-like element involved in anoxic specific inducibility										1
	GCN4_motif	cis-regulatory element involved in endosperm expression	1						1
	GT1-motif	light responsive element	6		3	1		1			2	1
	HD-Zip 1	element involved in differentiation of the palisade mesophyll cells					2
	HD-Zip 3	protein binding site	1
	I-box	part of a light responsive element	1						1
	LAMP-element	part of a light responsive element	1								1
	LS7	part of a light responsive element		1
	LTR	cis-acting element involved in low-temperature responsiveness		2	1			1				1
	MBS	MYB binding site involved in drought-inducibility	3	1						1		1
	MRE	MYB binding site involved in light responsiveness				1				1	1
	O2-site	cis-acting regulatory element involved in zein metabolism regulation			2			1	1	1	1
	P-box	gibberellin-responsive element					1	1	1			1
	TATA-box	core promoter element around -30 of transcription start	15	95	11	87	52	37	56	83	99	52
	TATC-box	cis-acting element involved in gibberellin-responsiveness	1		1		1					2
	TCA-element	cis-acting element involved in salicylic acid responsiveness	1	1			1				2
	TCCC-motif	part of a light responsive element		1		2					1
	TC-rich repeats	cis-acting element involved in defense and stress responsiveness		1		1	1
	TCT-motif	part of a light responsive element	2	1	1		1	1	5		2	2
	TGACG-motif	cis-acting regulatory element involved in the MeJA-responsiveness		1	2			1	2		1
	TGA-element	auxin-responsive element				1				1
	WUN-motif	wound-responsive element		1	1			1
